# Supplementary material for: Impact of STAT3 phosphorylation in glioblastoma stem cells radiosensitization and patient outcome
Source: PubMed Central journal article supplement (PMC5790515; doi:10.18632/oncotarget.23374), 2017-12-16
Supplement: oncotarget-09-3968-s001.pdf [file oncotarget-09-3968-s001.pdf]

## Impact of STAT3 phosphorylation in glioblastoma stem cells radiosensitization and patient outcome

### SUPPLEMENTARY MATERIALS

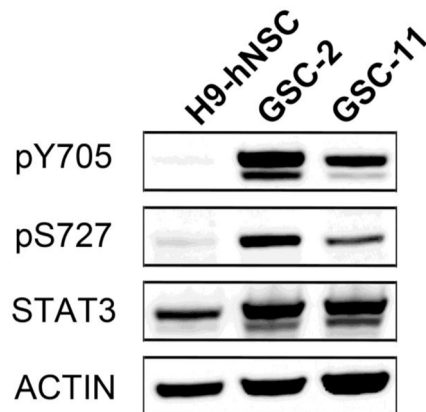

Supplementary Figure 1: STAT3 phosphorylation status in GSC lines compared to normal human Neural Stem Cells (H9-hNSC).

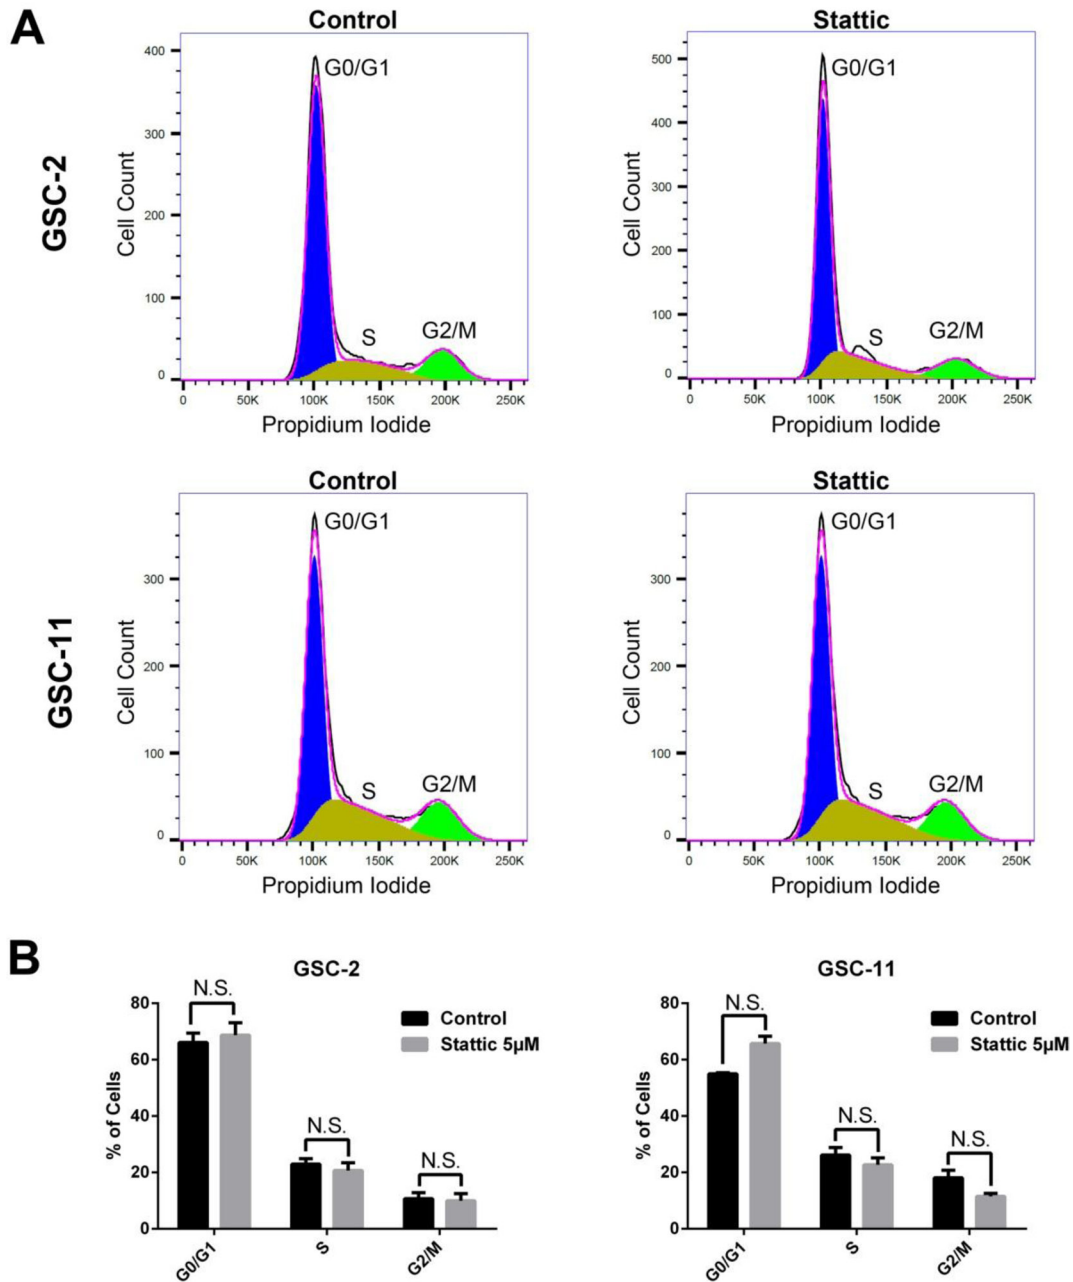

**Supplementary Figure 2: Static treatment does not affect cell cycle redistribution in GSCs.** (A) FACS analysis of cell cycle in GSC-2 and GSC-11 with or without Static treatment. (B) Quantification of experiment presented in (A). Histogram represents the mean  $\pm$  standard error of the mean of 4 independent experiments (N.S. not significant, Mann-Whitney test).

**Supplementary Table 1: Molecular characteristics of GSC-2 and GSC-11**

| <b>GSC line</b>             | <b>GSC-2</b> | <b>GSC-11</b> |
|-----------------------------|--------------|---------------|
| <b>IDH1</b>                 | WT           | WT            |
| <b>IDH2</b>                 | WT           | WT            |
| <b>p53</b>                  | WT           | WT            |
| <b>PTEN</b>                 | Mut          | WT            |
| <b>EGFRvIII</b>             | NO           | YES           |
| <b>EGFR amplification</b>   | polysomy     | polysomy      |
| <b>LOH 1p36</b>             | NO           | NO            |
| <b>LOH 19q13</b>            | NO           | NO            |
| <b>LOH 9p21</b>             | YES          | N.D.          |
| <b>LOH 10q23</b>            | YES          | N.D.          |
| <b>MGMT methylation (%)</b> | 1.6          | 94.2          |

**Supplementary Table 2: Clinical data of 61 GBM patients. See Supplementary\_Table\_2**
